# Supplementary material
Source: PubMed Central journal article supplement (PMC8375056)
Supplement: NIHMS1732901-supplement-Supplementary_materials.pdf [file NIHMS1732901-supplement-Supplementary_materials.pdf]

## 1.0 ICD 9 & ICD 10 codes

### A. Inclusion Criteria ICD-9 and 10 Codes

Takotsubo cardiomyopathy: 429.83 & ICD-10-CM code of I51.81.

Cardiogenic shock population was identified using ICD-9-CM of 785.51 and ICD-10-CM of R57.0

### B. ICD 9 and 10 Codes for complications:

1. PCI: 36.0 0270 ,0271,0272 & 0273
2. Cardiogenic shock: T8111XA, R57, 785.51 & 99801
3. pVAD use: 3768, 02HA3RZ,5A0221D
4. IABP Use: P3761,5A02110,5A02210
5. CPR: 9960, 9963, 5A12012
6. Vasopressors use: 0017,3E033XZ, 3E043XZ
7. Mechanical ventilation: 967,9670,9671,9672,5A1935Z,5A1945Z,5A1955Z
8. PEG: V441, V444, 9701, 9702, 430, 4311, 4319, 0D9640Z,  
0D964ZZ,0DC63ZZ,0DC64ZZ,0DH63YZ,0DP64YZ,0DW63YZ , 0DW64YZ, 0DW68YZ
9. Trach: V440, 51900, 51901, 51902, 51909, 311, 3129,  
0B110F4,0B110Z4,0B113F4,0B113Z4, 0B114F4, 0B114Z4
